# Supplementary material for: Vitamin D Supplementation is a Promising Therapy for Pancreatic Ductal Adenocarcinoma in Conjunction with Current Chemoradiation Therapy
Source: Springer Nature journal article supplement (doi:10.1245/s10434-018-6431-8), 2018-04-19
Supplement: MOESM2 [file 15707408]

| **Supplementary Table 1. Clinicopathological characteristics of patients with pancreatic ductal adenocarcinoma (n=86)** | |
| --- | --- |
|  | **Mean ± SD** |
| Age (years) | 67.2 ± 9.8 |
| Sex (M/F) | 53/33 |
| Tumor size (mm) | 23.7 ± 13.9 |
| CA19-9 (U ml-1) | 322.2 ± 722.1 |
| CEA (ng/ml) | 4.6 ± 11.9 |
| Operation (PD/DP/TP/PR) | 60/26/1/1 |
| Histopathological type (well/mod/poor/muc) | 1/79/3/3 |
| UICC pT (1/2/3/4) | 18/8/60/0 |
| UICC pN (0/1) | 57/29 |
| UICC pStage (IA/IB/IIA/IIB/III/IV) | 15/6/36/27/0/2 |
| Days before surgery (n±SD) | 80.5 ± 52.4 |
| Preoperative CRT (+/-) | 52/34 |
| Adjuvant chemotherapy (+/-) | 65/21 |
| The plasma level of 25 (OH) vitamin D (ng/ml) | 25.5 ± 14.5 |

Abbreviations: CI, confidence interval; PD, pancreaticoduodenectomy; DP, distal pancreatectomy; TP, total pancreatectomy; PR,
partial resection; mod, moderately differentiated; muc, mucinous; pT, pathological tumor stage; pN, pathological lymph node stage; |CRT, chemoradiation therapy; pT, pN and pStage defined by UICC classification (ver. 6).

| **Supplementary Table 2. Clinicopathological characteristics and 25 (OH) vitamin D plasma levels in patients with pancreatic ductal adenocarcinoma (n=47)** | | | |
| --- | --- | --- | --- |
|  | **High**  **(n=19)** | **Low**  **(n=28)** | **Univariate** |
| ***P* value** |
| Age (<65 y/>65 y) | 7/12 | 9/19 | 0.74 |
| Sex (male/female) | 13/6 | 16/12 | 0.44 |
| Tumor size (<20.0 mm/>20.0 mm) | 6/13 | 11/17 | 0.59 |
| CA19-9 (<37.0 U ml-1/>37.0 U ml-1) | 8/11 | 7/21 | 0.22 |
| CEA (<4.0 ng ml-1/>4.0 ng ml-1) | 16/3 | 21/7 | 0.45 |
| Preoperative biliary drainage for jaundice (1/0) | 9/10 | 6/22 | 0.073 |
| Operation (PD / DP/TP/PR) | 15/4 | 19/9 | 0.37 |
| Histopathological type (well/mod / poor/muc) | 19/0 | 25/3 | 0.4 |
| UICC pT (1/2 / 3/4) | 6/13 | 8/20 | 0.83 |
| UICC pN (0/1) | 12/7 | 20/8 | 0.55 |
| UICC pStage (IA/IB/IIA / IIB/III/IV) | 12/7 | 18/10 | 0.94 |
| Preoperative CRT (+/-) | 9/10 | 21/7 | 0.053 |
| Adjuvant chemotherapy (+/-) | 11/8 | 21/7 | 0.22 |

Abbreviations: CI, confidence interval; PD, pancreaticoduodenectomy; DP, distal pancreatectomy; TP, total pancreatectomy; PR, partial resection; mod, moderately differentiated; muc, mucinous; pT, pathological tumor stage; pN, pathological lymph node stage; CRT, chemoradiation therapy; pT, pN and pStage defined by UICC classification (ver. 6).
